# Supplementary material
Source: PubMed Central journal article supplement (PMC3116417)
Supplement: 1014497108_pnas.201014497SI.pdf [file 1014497108_pnas.201014497SI.pdf]

# Supporting Information

## Becker and Zamudio 10.1073/pnas.1014497108

**Table S1.** Model selection for biotic and abiotic variables influencing *Batrachochytrium dendrobatidis* (*Bd*) occurrence in populations of *Craugastor fitzingeri* in Costa Rica and *Bd* prevalence and infection intensity in populations of *Litoria lesueuri* in Australia

| Model                                              | AIC     | No. of variables | $r^2$ |
|----------------------------------------------------|---------|------------------|-------|
| <b>Occurrence</b>                                  |         |                  |       |
| LOSS, RICH                                         | 67.584  | 2                |       |
| LOSS, RICH, BIO7                                   | 67.974  | 3                |       |
| LOSS, RICH, BIO7, RICH*BIO7                        | 68.891  | 4                |       |
| LOSS, RICH, BIO7, RICH*BIO7, LOSS*BIO7             | 68.918  | 5                |       |
| LOSS, RICH, LOSS*RICH                              | 69.166  | 3                |       |
| <b>Prevalence</b>                                  |         |                  |       |
| LOSS, RICH, LAT&BIO5, RICH*LAT&BIO5                | 271.594 | 4                | 0.632 |
| LOSS, LAT&BIO5, BIO18                              | 273.882 | 3                | 0.590 |
| LOSS, RICH, LAT&BIO5, BIO18, RICH*LAT&BIO5         | 274.516 | 5                | 0.641 |
| LOSS, RICH, LAT&BIO5, RICH*LOSS, RICH*LAT&BIO5     | 274.671 | 5                | 0.639 |
| LOSS, RICH, LAT&BIO5, LOSS*LAT&BIO5, RICH*LAT&BIO5 | 275.290 | 5                | 0.632 |
| <b>Infection intensity</b>                         |         |                  |       |
| LOSS, BIO14                                        | 89.429  | 2                | 0.582 |
| LOSS, BIO14, LOSS*BIO14                            | 91.892  | 3                | 0.590 |
| LOSS, LAT&BIO8, BIO14                              | 92.467  | 3                | 0.582 |
| LOSS, LAT&BIO8, BIO14, LOSS*LAT&BIO8               | 93.954  | 4                | 0.607 |
| LOSS, LAT&BIO8, BIO14, LOSS*BIO14                  | 95.188  | 4                | 0.591 |

We compared all possible models using Akaike Information Criterion (AIC); five best models are reported for each dataset. Best predictors are: habitat loss (LOSS), amphibian species richness (RICH), temperature annual range (BIO7), precipitation of warmest quarter (BIO18), latitude and maximum temperature of the warmest month consolidated in the first principal component [96.00% of the variation in the original variables (LAT&BIO5)], latitude and mean temperature of wettest quarter consolidated in the first principal component [95.40% of the variation in the original variables (LAT&BIO8)], and precipitation of the driest month (BIO14).
